# Supplementary material for: Altered reaction pathways of eutectic LiBH4–Mg(BH4)2 by nanoconfinement
Source: Royal Society of Chemistry journal article supplement (doi:10.1039/c2ta00542e), 2013-01-01
Supplement: c2ta00542e.pdf [file c2ta00542e.pdf]

## Electronic Supplementary Information (ESI)

### Altered Reaction Pathways of Eutectic $\text{LiBH}_4\text{-Mg}(\text{BH}_4)_2$ by Nanoconfinement

Zhirong Zhao-Karger,<sup>\*a</sup> Raiker Witter,<sup>b</sup> Elisa Gil Bardají,<sup>a</sup> Di Wang,<sup>a</sup> Daniel Cossement<sup>c</sup> and  
Maximilian Fichtner<sup>a</sup>

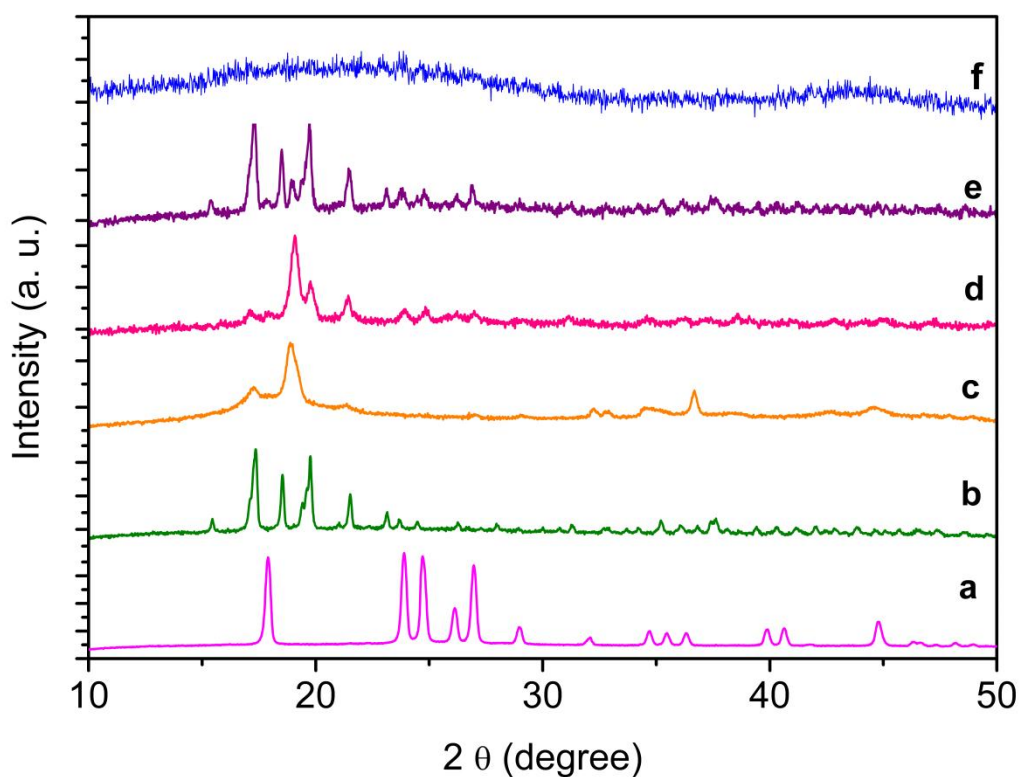

**Fig. S1** XRD patterns of **a**  $\text{LiBH}_4$  ball-milled for 12h; **b**  $\alpha\text{-Mg}(\text{BH}_4)_2$ ; **c** ball-milled  $\alpha\text{-Mg}(\text{BH}_4)_2$ , i.e.  $\beta\text{-Mg}(\text{BH}_4)_2$ ; **d** LMBH composite prepared by ball-milling; **e** LMBH composite after heating treatment at  $190^\circ\text{C}$  under 40 bar of  $\text{H}_2$ ; **f** LMBH/IRH33 composite

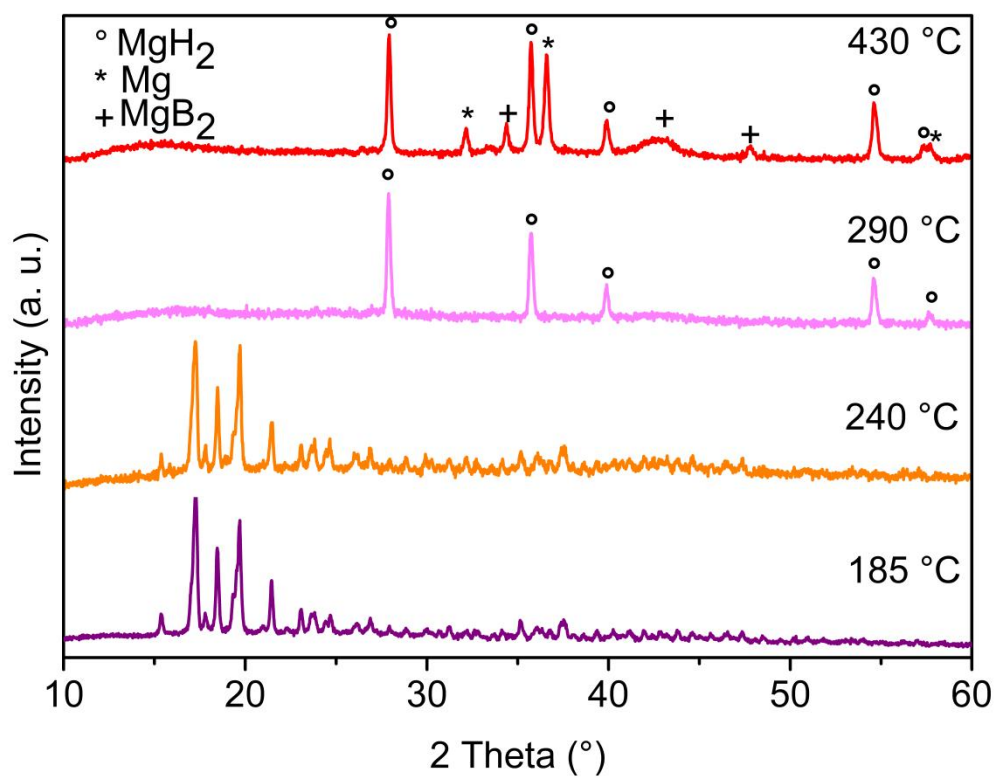

**Fig. S2** *Ex situ* X-ray diffraction patterns of the decomposed products of the eutectic  $\text{LiBH}_4\text{-Mg}(\text{BH}_4)_2$  at different temperatures

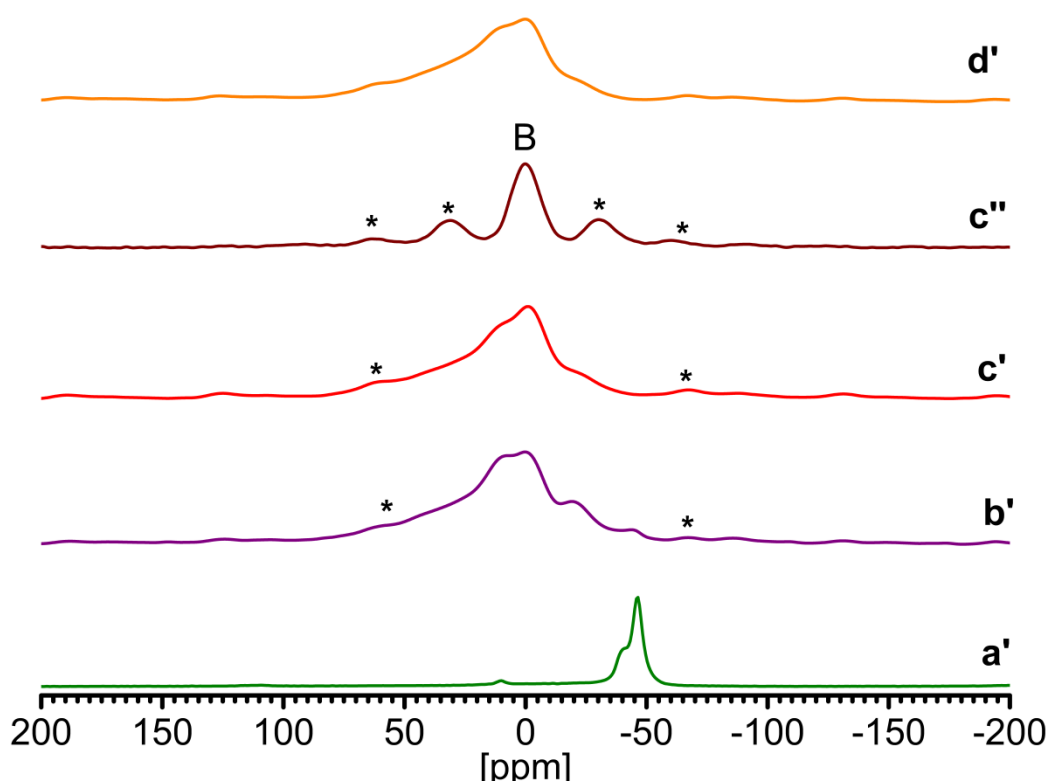

**Fig. S3**  $^{11}\text{B}$  MAS-NMR spectra of samples of LMBH/IRH33 at different stages of dehydrogenation **a'** starting material LMBH/IRH33; **b'** sample desorbed at 280 °C; **c'** sample desorbed at 380°C; **c''** NMR double angle rotation experiments<sup>1</sup> for the decomposed sample at 380°C (see spectrum) **d'** sample desorbed 410 °C, \*Indicates spinning side bands

## References

- 1 A. Samoson, E. Lippmaa and A. Pines, *Mol. Phys.*, 1988, **65**, 1013.
